# Supplementary figures and images for: Recumbency as an Equine Welfare Indicator in Geriatric Horses and Horses with Chronic Orthopaedic Disease
Source: MDPI journal article supplement (doi:10.3390/ani11113189), 2021-11-08

# Comparative Recumbency

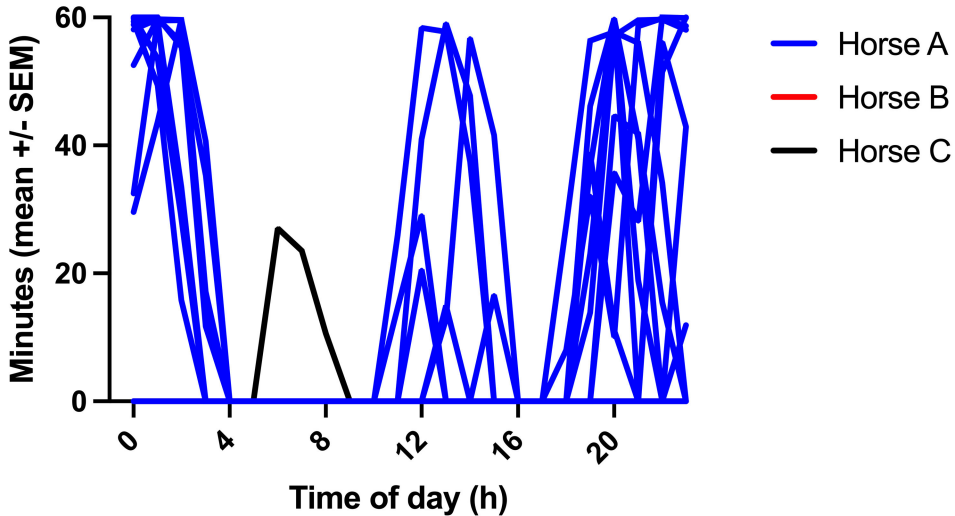

Supplement: s1 [file s1]
